# Supplementary material for: Decarbonation embrittlement of scapolite as a trigger for earthquakes in the lower crust
Source: Research Square preprint supplement (doi:10.21203/rs.3.rs-6694269/v1), 2025-05-28

**Extended Data**

for the paper “Decarbonation embrittlement of scapolite as a trigger for earthquakes in the lower crust” byYoonhae Ha, Haemyeong Jung, Sejin Jung, Jung Hun Seo, and Håkon Austrheim.

**Extended Data Figures**

Extended Data Fig. 1.

**Extended Data Tables**

Extended Data Table 1.

Extended Data Table 2.

**Extended Data Fig. 1.** Different types of Raman spectra of scapolite grains in the samples (JH191 and JH201). The frequency of different spectra of scapolite is shown in Extended Data Table 2. Most spectra of scapolites in both samples did not show the Raman shift at 1100 cm-1 and/or 982 cm-1.

**
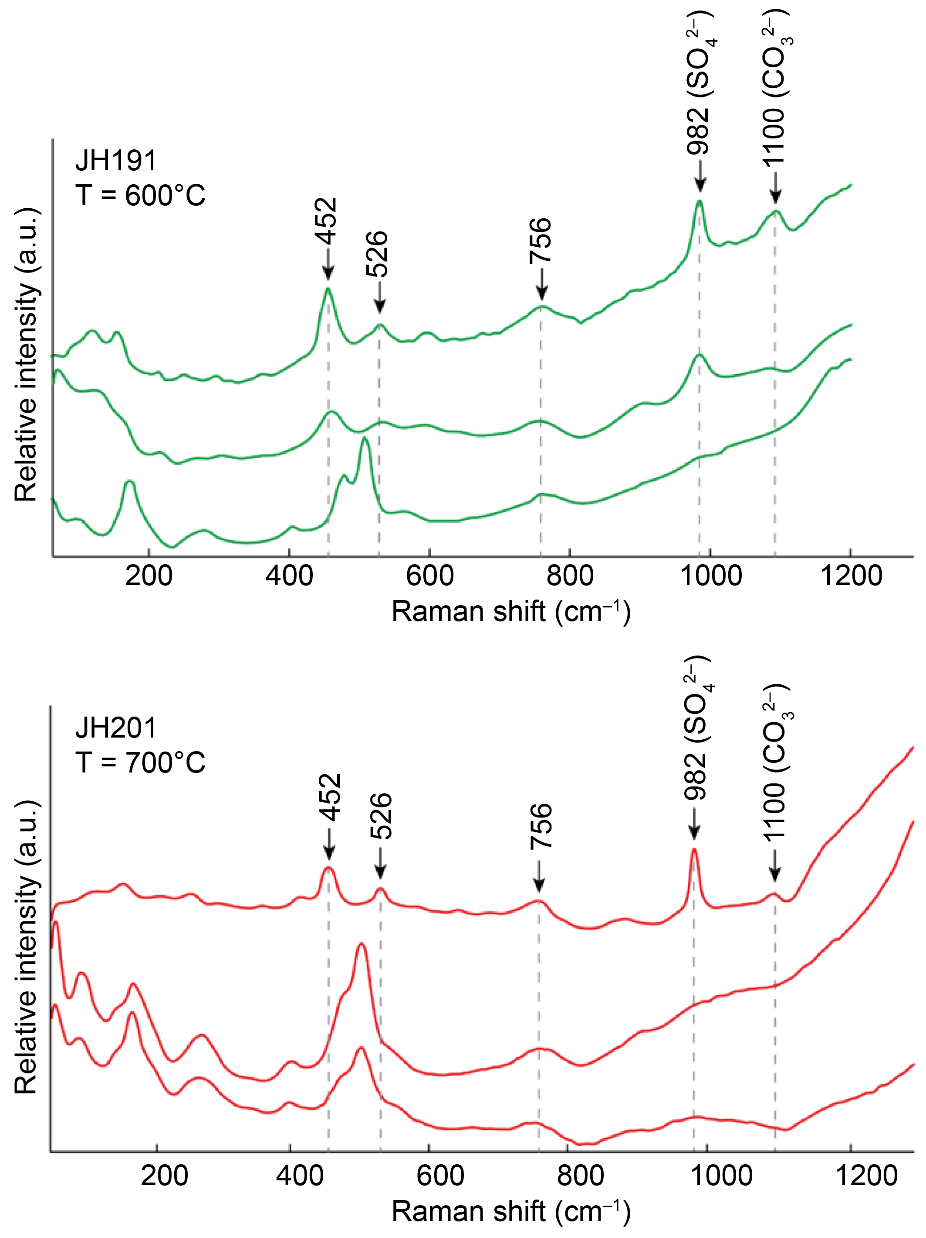
**

**Extended Data** **Table 1**. Composition of representative scapolite in hot-pressed (JH205) and deformed (JH191, JH201, and JH219) samples. Values are in oxide weight percent. Notably, some scapolites in deformed samples include very low amounts of S. Scapolite is normalized to T = Si + Al + Fe3+ = 12. Meionite component is Me = Ca/(Ca + Na) 100; equivalent anorthite component is EqAn = 100 (Al–3)/3.


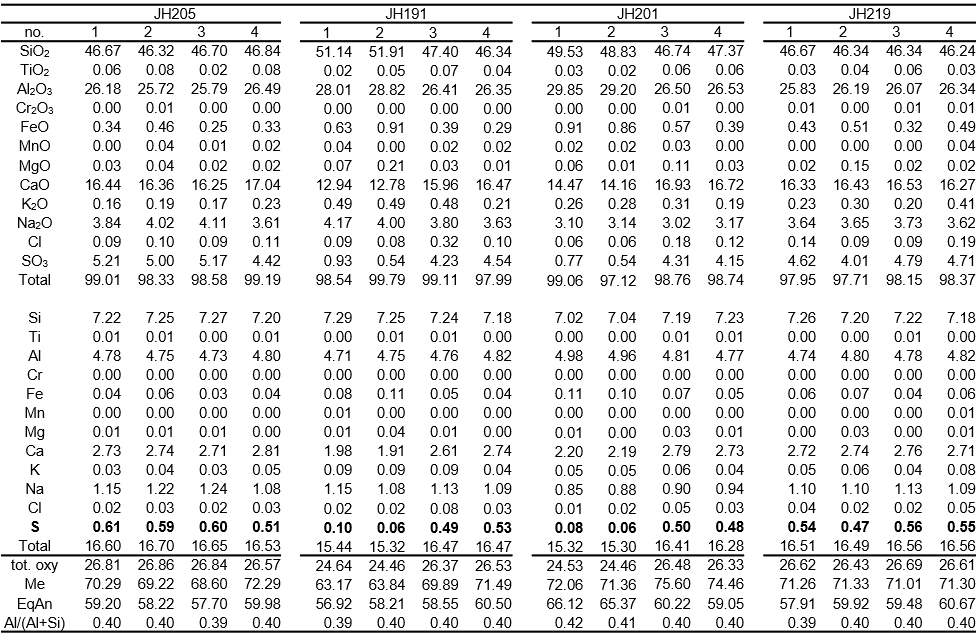


**Extended Data** **Table 2.** Result of Raman analysis of scapolites in the samples.

Notably, most scapolites in the faulted samples (JH219, 191, and 201) showed the absence of a Raman peak (CO32-) at 1100 cm-1.

SO42- showed a peak at the Raman shift 982 cm-1.

CO32- showed a peak at the Raman shift 1100 cm-1.


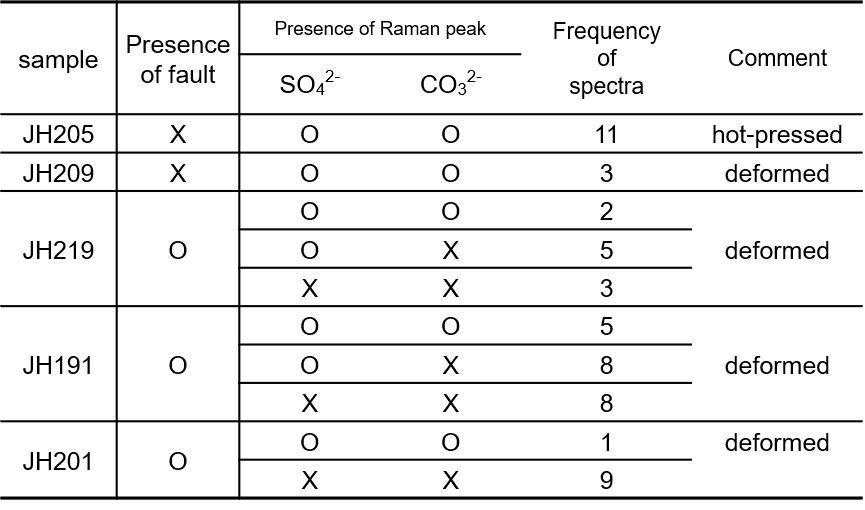

Supplement: Supplementary file 1 [file 74f65f0b72066b8c166839a1.docx]
